# Supplementary material for: Adenine base editor–mediated correction of the common and severe IVS1-110 (G>A) β-thalassemia mutation
Source: PubMed Central journal article supplement — Blood. 2022 Dec 15;141(10):1169–79. doi: 10.1182/blood.2022016629 (PMC10651780; doi:10.1182/blood.2022016629), 2022-12-15

## Supplemental Tables

### Supplemental Table 1. gRNA target sequences.

| gRNA     | Sequence (5' to 3') | PAM sequence (5' to 3') | Position (hg19)                      | Strand | Compatible ABEs             |
|----------|---------------------|-------------------------|--------------------------------------|--------|-----------------------------|
| gRNA1    | TTAGTCTATTTCCACCCCT | TAG                     | chr11:5248033-5248052 ( <i>HBB</i> ) | -      | SpRY-ABE8e, NG-ABE8e, ABE8e |
| gRNA2    | ATTAGTCTATTTCCACCC  | TTA                     | chr11:5248034-5248053 ( <i>HBB</i> ) | -      | SpRY-ABE8e                  |
| gRNA3    | TATTAGTCTATTTCCACC  | CTT                     | chr11:5248035-5248054 ( <i>HBB</i> ) | -      | SpRY-ABE8e                  |
| gRNA4    | CTATTAGTCTATTTCCAC  | CCT                     | chr11:5248036-5248055 ( <i>HBB</i> ) | -      | SpRY-ABE8e                  |
| gRNA5    | CCTATTAGTCTATTTCCCA | CCC                     | chr11:5248037-5248056 ( <i>HBB</i> ) | -      | SpRY-ABE8e                  |
| gRNA6    | GCCTATTAGTCTATTTCCC | ACC                     | chr11:5248038-5248057 ( <i>HBB</i> ) | -      | SpRY-ABE8e                  |
| gRNA1_HD | TTGGTCTATTTCCACCCCT | TAG                     | chr11:5248033-5248052 ( <i>HBB</i> ) | -      | SpRY-ABE8e, NG-ABE8e, ABE8e |

PAM, Protospacer Adjacent Motif.

### Supplemental Table 2. *In silico* predicted off targets.

| Off-target | Sequence (5' to 3') | Mismatches | Position (hg19)          | Strand | Score | Type                   |
|------------|---------------------|------------|--------------------------|--------|-------|------------------------|
| OT1        | GTAGTCTATTTCCACCCCT | 1          | Chr10:36827935-36827954  | +      | 0.12  | Intergenic             |
| OT2        | CTAGCCTATTTCCACCCCT | 2          | Chr1:104536228-104536247 | -      | 0.31  | Intergenic             |
| OT3        | TCAGTCCATTTCCACCCCT | 2          | ChrX:136953484-136953503 | +      | 0.36  | Intergenic             |
| OT4        | TTGGTCGATTTCCACCCCT | 2          | Chr8:129251336-129251355 | +      | 0.38  | Intergenic             |
| OT5        | TTAGGTTATTTCCACCCCT | 2          | Chr3:65005077-65005096   | -      | 0.40  | Intergenic             |
| OT6        | TTTGTCTCTTTCCACCCCT | 2          | Chr12:40609156-40609175  | +      | 0.42  | Intergenic             |
| OT7        | TTTGTCTCTTTCCACCCCT | 2          | Chr8:89004815-89004834   | -      | 0.42  | Intergenic             |
| OT8        | TTAGTAAATTTCCACCCCT | 2          | Chr12:11337215-11337234  | +      | 0.44  | Intronic – <i>PRB4</i> |
| OT9        | TTAGCCTAGTTCCACCCCT | 2          | ChrX:142880716-142880735 | +      | 0.54  | Intergenic             |
| OT10       | TTAGCTATTTCCACCCCT  | 0 (Del 16) | Chr4:59423629-59423647   | -      | 0.70  | Intergenic             |

OT, Off-target; Del, Deletion.

### Supplemental Table 3. Primers used for targeted NGS.

| Amplified region | F/R | Sequence (5' to 3')                                              |
|------------------|-----|------------------------------------------------------------------|
| On target        | F   | GCAGCGTCAGATGTGTATAAGAGACAGCTGGGCATGTGGAGACAGAG                  |
|                  | R   | TGGGCTCGGAGATGTGTATAAGAGACAGTTGCCATGAGCCTTCACCTT                 |
| OT1              | F   | GCAGCGTCAGATGTGTATAAGAGACAGGCTCAGAAACAGGATGTCATCATTTCCTC         |
|                  | R   | TGGGCTCGGAGATGTGTATAAGAGACAGCTTCCCTAAATCAGCAACCCTTGG             |
| OT2              | F   | GCAGCGTCAGATGTGTATAAGAGACAGGGTCATATTACAGGCCAAAAATAGAAAATCCTTGTGG |
|                  | R   | TGGGCTCGGAGATGTGTATAAGAGACAGAAAAGTGCAACTTGGTGGCAGAATCTAATTTGAATC |
| OT3              | F   | GCAGCGTCAGATGTGTATAAGAGACAGTGTGGATTCTTGCAGGCACGG                 |
|                  | R   | TGGGCTCGGAGATGTGTATAAGAGACAGGGATACAGAGAGAGGATGGAGAG              |
| OT4              | F   | GCAGCGTCAGATGTGTATAAGAGACAGGATGCTAGGATCTGACTTCTGTGC              |

|      |   |                                                               |
|------|---|---------------------------------------------------------------|
|      | R | TGGGCTCGGAGATGTGTATAAGAGACAGCCAAGAGCACTAGCCCTTCAC             |
| OT5  | F | GCAGCGTCAGATGTGTATAAGAGACAGCCCTCGGGCTTTTAACACATGC             |
|      | R | TGGGCTCGGAGATGTGTATAAGAGACAGCAGCTTCCACATGAGATGATTCCC          |
| OT6  | F | GCAGCGTCAGATGTGTATAAGAGACAGCTGGATCCCTTCAATAGCCTCCT            |
|      | R | TGGGCTCGGAGATGTGTATAAGAGACAGGTGGCCACTGCAAAGTCTTCC             |
| OT7  | F | GCAGCGTCAGATGTGTATAAGAGACAGCATCTTCAGTAAGTCAGTGTAGATGTACTTTCC  |
|      | R | TGGGCTCGGAGATGTGTATAAGAGACAGTTTTTTCCCTCTTCTGCCTCCTCC          |
| OT8  | F | GCAGCGTCAGATGTGTATAAGAGACAGCAGCTTCTGTACAGTGTTTAATCTATGCCATC   |
|      | R | TGGGCTCGGAGATGTGTATAAGAGACAGGACAAGCATATGTATACATAGTGCTGCTTTGAC |
| OT9  | F | GCAGCGTCAGATGTGTATAAGAGACAGTGTCTCAGGCTCCCAAGCTTC              |
|      | R | TGGGCTCGGAGATGTGTATAAGAGACAGCAGACTTGGTGGATTTTACTAAGACCCG      |
| OT10 | F | GCAGCGTCAGATGTGTATAAGAGACAGTGGGCCATTCAATCTTTACTTTTG           |
|      | R | TGGGCTCGGAGATGTGTATAAGAGACAGGGAGTGGTTAACTGCCCCATT             |

F, forward primer; R, reverse primer.

## Supplemental figure legends

### Supplemental Figure 1. Impact of bystander edits on *HBB* expression.

**A.** Frequency of alleles carrying bystander 1 (C) at position 6 and bystander 2 (A) at position 8 in edited healthy donor (HD) and  $\beta$ -thalassemia (BT) samples (n=3; 3  $\beta$ -thalassemia patients and 2 HD). Data are expressed as mean $\pm$ SEM. **B.** RT-qPCR detecting  $\beta$ -globin mRNAs in erythroid cells derived from edited HD cells carrying the bystander edits (HD-IVS1-110). As controls, we used erythroid cells derived from HD HSPCs transfected only with TE (HD-TE) or SpRY-ABE8e mRNA (HD-BE). Data from erythroid cells derived from HD (n=2 donors) and control  $\beta$ -thalassemic HSPCs were included (BT-TE; 3  $\beta$ -thalassemia patients).  $\beta$ -globin expression was normalized to  $\alpha$ -globin. Data are expressed as mean $\pm$ SEM (n=3). \*\*\*\* p $\leq$ 0.0001 (One-way Anova, HD-BE vs other conditions). **C.** Expression of  $\beta$ -,  $\gamma^G$ - and  $\gamma^A$ - globin chains measured by RP-HPLC in HD RBCs.  $\beta$ -like-globin expression was normalized to  $\alpha$ -globin. The  $\alpha$ -non- $\alpha$  globin ratio is reported on top of the graph. RBCs were obtained from edited HD cells carrying the bystander edits (HD-IVS1-110). As controls, we used erythroid cells derived from HD HSPCs transfected only with TE (HD-TE) or SpRY-ABE8e mRNA (HD-BE). Data from erythroid cells derived from HD (n=2 donors) and  $\beta$ -thalassemic HSPCs were included (BT-TE; 3  $\beta$ -thalassemia patients). Data are expressed as mean $\pm$ SEM (n=3). Dotted lines indicate maximum and minimum values observed for  $\beta$ -globin in HD-TE conditions. **D.** Analysis of HbF, HbA and HbA<sub>2</sub> by CE-HPLC in HD RBCs. We calculated the percentage of each Hb type over the total Hb tetramers. RBCs were obtained from edited HD cells carrying the bystander edits (HD-IVS1-110). As controls, we used erythroid cells derived from HD HSPCs transfected only with TE (HD-TE) or SpRY-ABE8e mRNA (HD-BE). Data from erythroid cells derived from HD (n=2 donors) and  $\beta$ -thalassemic HSPCs were included (BT-TE; 3  $\beta$ -thalassemia patients). Data are expressed as mean $\pm$ SEM (n=3). **E.** Frequency of GPA<sup>+</sup>, CD71<sup>+</sup> and CD36<sup>+</sup> cells at day 19 of erythroid differentiation, as measured by flow cytometry analysis. RBCs were obtained from edited HD cells carrying the bystander edits (HD-IVS1-110). As controls, we used erythroid cells derived from HD HSPCs transfected only with TE (HD-TE) or SpRY-ABE8e mRNA (HD-BE) (n=2 donors). Data are expressed as mean $\pm$ SEM (n=3). **F.** Frequency of enucleated cells at day 13, 16 and 19 of erythroid differentiation, as measured by flow cytometry analysis of cells stained with the DRAQ5 nuclear dye. RBCs were obtained from edited HD cells carrying the bystander edits (HD-IVS1-110). As controls, we used erythroid cells derived from HD HSPCs transfected only with TE (HD-TE) or SpRY-ABE8e mRNA (HD-BE) (n=2 donors). rep = replicate. Data are expressed as mean $\pm$ SEM (n=3). **G.** Flow cytometry histograms showing the frequency of apoptotic cells (AnnexinV<sup>+</sup>-cells) in the 7AAD<sup>-</sup> cell population of HD samples carrying the bystander edits (HD-IVS1-110) at day 13 of erythroid differentiation. As controls, we used erythroid cells derived from HD HSPCs transfected only with TE (HD-TE) or SpRY-ABE8e mRNA (HD-BE) (n=2 donors). Uns = unstained, rep = replicate (n=3).

### Supplemental Figure 2. On and off-target editing in $\beta$ -thalassemic cells.

**A.** Experimental protocol used for base editing experiments in  $\beta$ -thalassemic HSPCs. SpRY-ABE8e mRNA and synthetic gRNA1 were co-transfected in  $\beta$ -thalassemic HSPCs. Cells were plated in a methylcellulose-based medium under conditions supporting erythroid (BFU-E) and granulomonocytic (CFU-GM) differentiation, or

differentiated into mature RBCs using a three-phase erythroid differentiation protocol. **B.** Percent composition of Sanger sequencing traces measured to be significantly different from noise (in red), as assessed by EditR following Sanger sequencing in  $\beta$ -thalassemic CD34<sup>+</sup> cells transfected with gRNA1/SpRY-ABE8e (cor) or with TE buffer (TE). Target base position is highlighted with a red box and the bystander edits with black boxes (3 donors). **C.** Frequency of base editing (left panel) and InDels (right panel) at the *HBB* gene and at the top-10 predicted off-targets (OTs) in control (BT-TE) and edited (BT-cor)  $\beta$ -thalassemic samples, as measured by targeted NGS sequencing (3  $\beta$ -thalassemia patients). \*\*\*\*  $p \leq 0.0001$  (Two-way ANOVA). On-target editing for the compound heterozygous BT2 was calculated considering all the reads harboring a G at the target site as “edited”. **D.** Frequency and sequence of modified and unmodified alleles in corrected  $\beta$ -thalassemic samples, as measured by targeted NGS sequencing. Target base position is highlighted with a red box. Bystander edits are present at positions 6 and 8 (black boxes), and at positions -1 and -2 although at low frequency. **E.** Product purity of SpRY-ABE8e, as indicated by the type of substitution measured by targeted NGS sequencing.

### **Supplemental Figure 3. CFC assay from $\beta$ -thalassemic HSPCs.**

**A.** CFC frequency in control (TE or BE) and corrected  $\beta$ -thalassemic HSPCs (cor). (2  $\beta$ -thalassemia patients, BT0 data were not plotted as we obtained only few colonies even in control samples, i.e.  $\leq 10$ ). **B.** Frequency of corrected alleles (left panel) and InDels (right panel), as evaluated by Sanger sequencing in single colonies derived from corrected and control  $\beta$ -thalassemic HSPCs (BT1 and BT2  $\beta$ -thalassemia patients). In the right panel, the dotted line represents the maximum background noise of InDels calculated by TIDE.

### **Supplemental Figure 4. RP-HPLC chromatographs of *in vitro* differentiated RBCs.**

RP-HPLC chromatographs from *in vitro* differentiated RBCs derived from corrected  $\beta$ -thalassemic HSPCs (BT0-2#cor). As controls, we used HD and  $\beta$ -thalassemic HSPCs transfected only with SpRY-ABE8e mRNA (representative HD0#BE and BT0-2#BE chromatographs).

### **Supplemental Figure 5. Analysis of RBC parameters by quantitative phase microscopy**

**A-E.** Quantitative phase microscopy analysis of individual RBCs obtained from corrected  $\beta$ -thalassemic HSPCs (BT-cor, red curve) at day 19 of differentiation. As controls, we used RBCs derived from  $\beta$ -thalassemic HSPCs transfected only with SpRY-ABE8e (BT-BE, black curve) or HD HSPCs transfected only with SpRY-ABE8e (HD-BE, gray curve) (3  $\beta$ -thalassemia patients and 2 HDs). We reported the relative number of RBCs with different perimeter (A), surface (B), optical volume (C), dry mass (D) and surface density (E) values. Data were reported as overlaid histograms.

### **Supplemental Figure 6. Bystander editing efficiency in repopulating HSCs.**

Frequency of edited alleles at on-target, bystander 1 and bystander 2 positions, as evaluated by EditR in input HSPCs and in the bone marrow 16 weeks after xenotransplantation. The frequency of base editing in the input was calculated in cells cultured in the HSPC medium ( $\blacktriangle$ ), in liquid erythroid cultures ( $\blacktriangledown$ ), BFU-E ( $\blacksquare$ ) and CFU-GM ( $\blacklozenge$ ) colonies. For editing at 16 weeks, each data point represents an

individual mouse transplanted with corrected HSPCs (n=5). Data are expressed as mean±SEM.

### Supplemental references

1. Zeng J, Wu Y, Ren C, et al. Therapeutic base editing of human hematopoietic stem cells. *Nat. Med.* 2020;26(4):535–541.
2. Patsali P, Papasavva P, Stephanou C, et al. Short-hairpin RNA against aberrant HBBIVSI-110(G>A) mRNA restores  $\beta$ -globin levels in a novel cell model and acts as mono- and combination therapy for  $\beta$ -thalassemia in primary hematopoietic stem cells. *Haematologica.* 2018;103(9):e419–e423.
3. Xu S, Luk K, Yao Q, et al. Editing aberrant splice sites efficiently restores  $\beta$ -globin expression in  $\beta$ -thalassemia. *Blood.* 2019;133(21):2255–2262.
4. Patsali P, Turchiano G, Papasavva P, et al. Correction of IVS I-110(G>A)  $\beta$ -thalassemia by CRISPR/Cas- and TALEN-mediated disruption of aberrant regulatory elements in human hematopoietic stem and progenitor cells. *Haematologica.* 2019;104(11):e497–e501.
5. Haapaniemi E, Botla S, Persson J, Schmierer B, Taipale J. CRISPR-Cas9 genome editing induces a p53-mediated DNA damage response. *Nat. Med.* 2018;24(7):927–930.
6. Boutin J, Cappellen D, Rosier J, et al. ON-Target Adverse Events of CRISPR-Cas9 Nuclease: More Chaotic than Expected. *CRISPR J.* 2022;5(1):19–30.
7. Park SH, Lee CM, Dever DP, et al. Highly efficient editing of the  $\beta$ -globin gene in patient-derived hematopoietic stem and progenitor cells to treat sickle cell disease. *Nucleic Acids Res.* 2019;47(15):7955–7972.
8. Steinberg MH. Fetal hemoglobin in  $\beta$  hemoglobinopathies: Is enough too much? *Am. J. Hematol.* 2022;
9. Topfer S, Feng R, Huang P, et al. Disrupting the adult-globin promoter alleviates promoter competition and reactivates foetal-globin gene expression. *Blood.* 2022;blood.2021014205.
10. Markt S, Scaramuzza S, Cicalese MP, et al. Intrabone hematopoietic stem cell gene therapy for adult and pediatric patients affected by transfusion-dependent  $\beta$ -thalassemia. *Nat. Med.* 2019;25(2):234–241.
11. Giarratana M-C, Kobari L, Lapillonne H, et al. Ex vivo generation of fully mature human red blood cells from hematopoietic stem cells. *Nat. Biotechnol.* 2005;23(1):69–74.
12. Weber L, Frati G, Felix T, et al. Editing a  $\gamma$ -globin repressor binding site restores fetal hemoglobin synthesis and corrects the sickle cell disease phenotype. *Sci. Adv.* 2020;6(7):.
13. Kluesner MG, Nedveck DA, Lahr WS, et al. EditR: A Method to Quantify Base Editing from Sanger Sequencing. *CRISPR J.* 2018;1:239–250.
14. Brinkman EK, Chen T, Amendola M, van Steensel B. Easy quantitative assessment of genome editing by sequence trace decomposition. *Nucleic Acids Res.* 2014;42(22):e168.
15. Cradick TJ, Qiu P, Lee CM, Fine EJ, Bao G. COSMID: A Web-based Tool for Identifying and Validating CRISPR/Cas Off-target Sites. *Mol. Ther. Nucleic Acids.* 2014;3(12):e214.
16. Clement K, Rees H, Canver MC, et al. CRISPResso2 provides accurate and rapid genome editing sequence analysis. *Nat. Biotechnol.* 2019;37(3):224–226.

# Supplemental Figure 1

## A

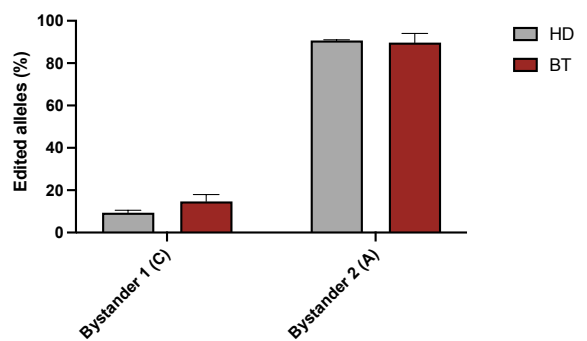

## B

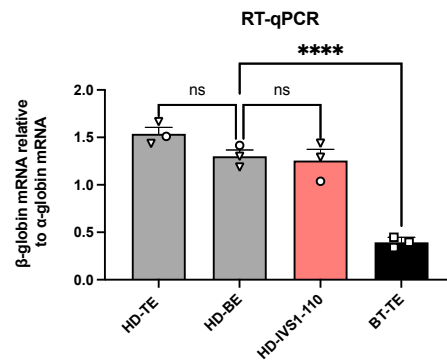

## C

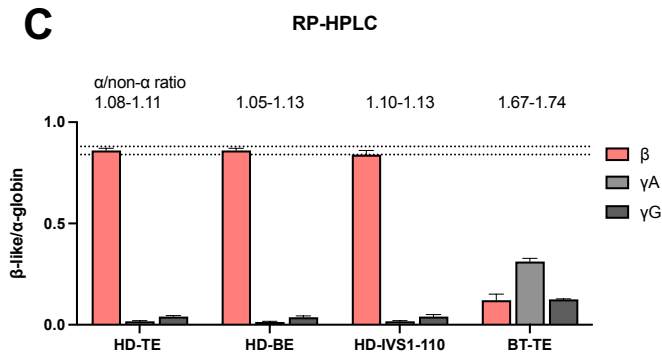

## D

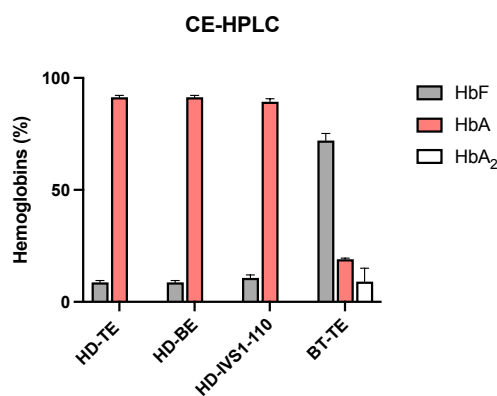

## E

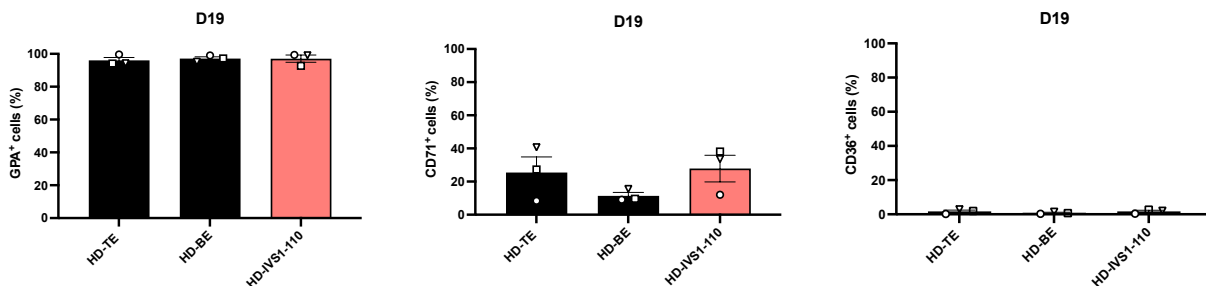

## F

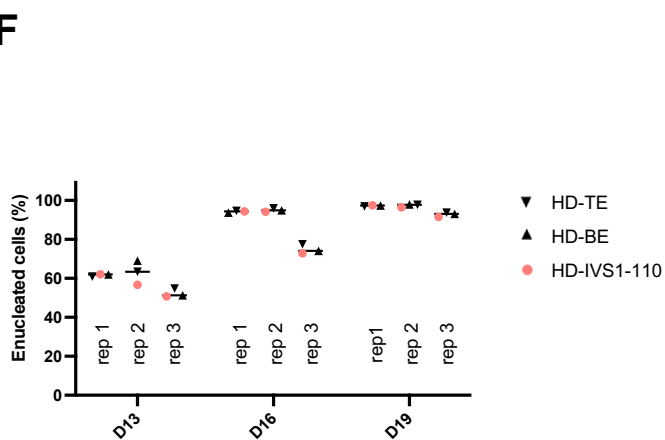

## G

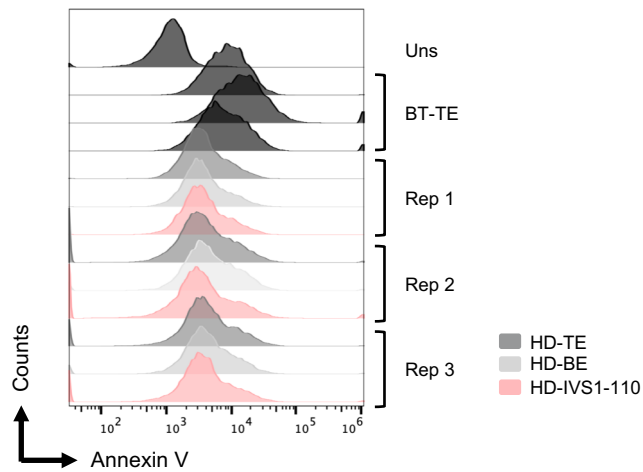

Supplemental Figure 2

A

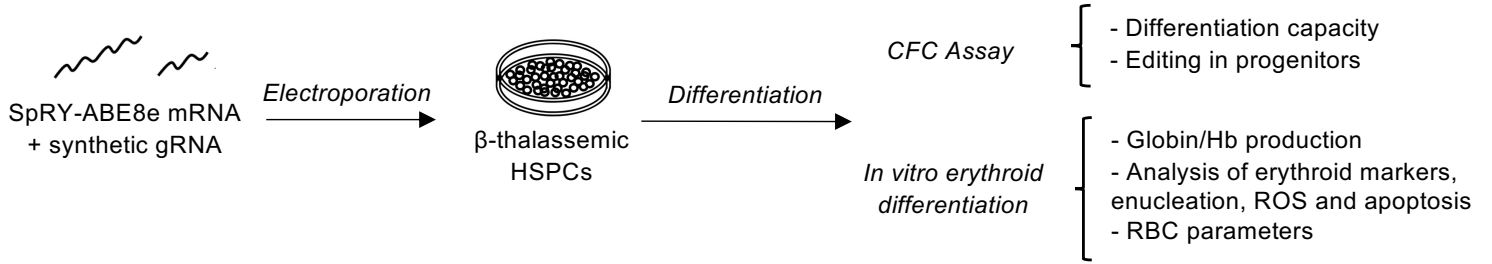

B

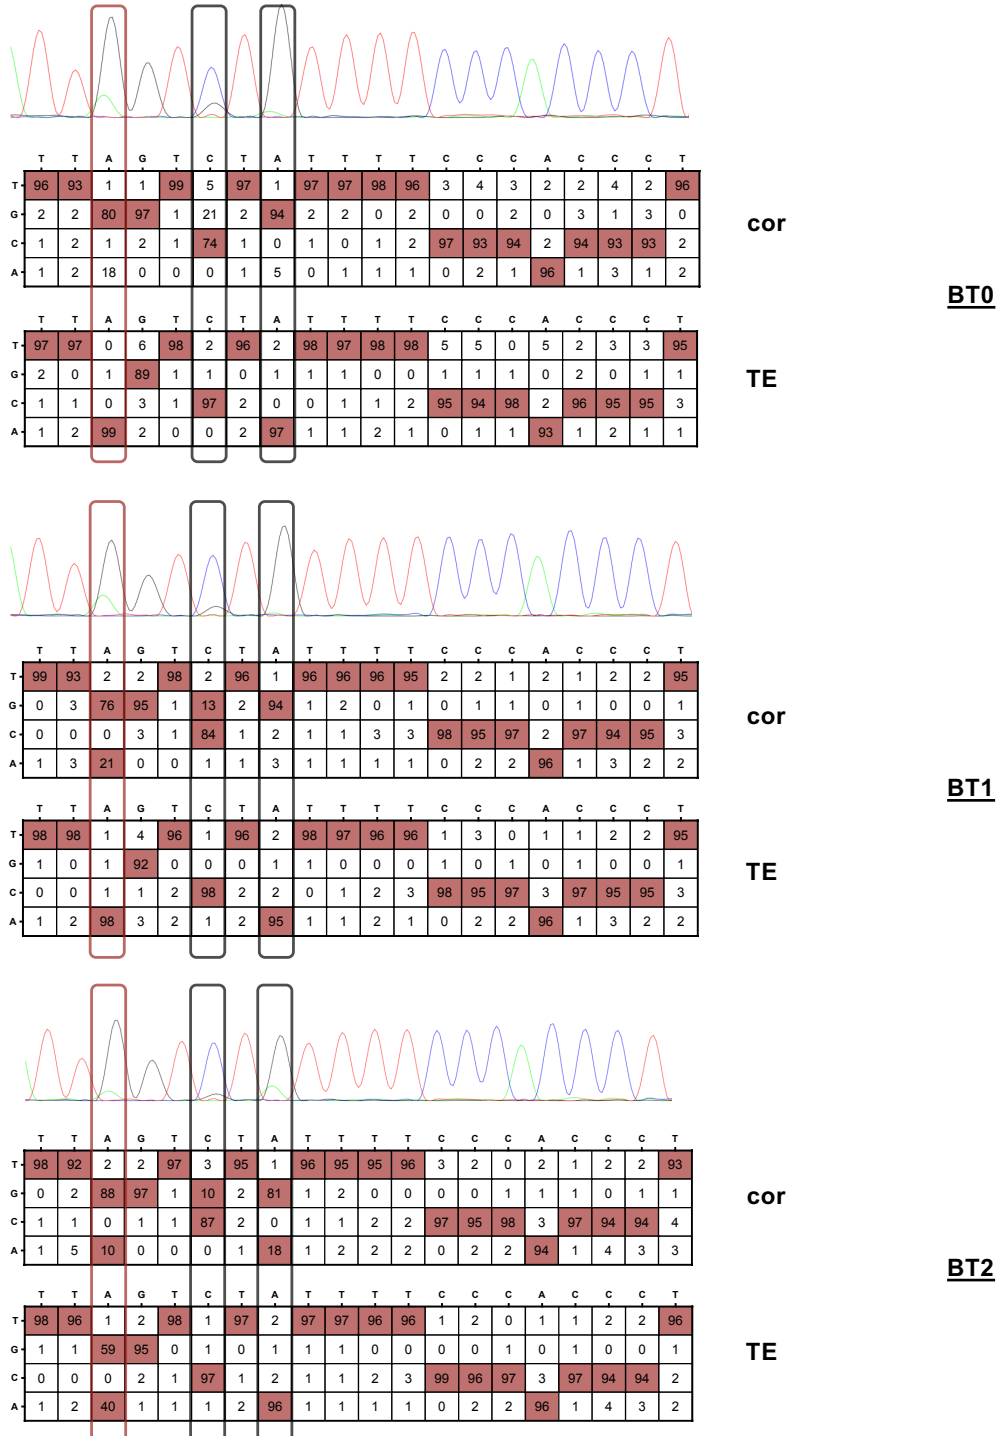

C

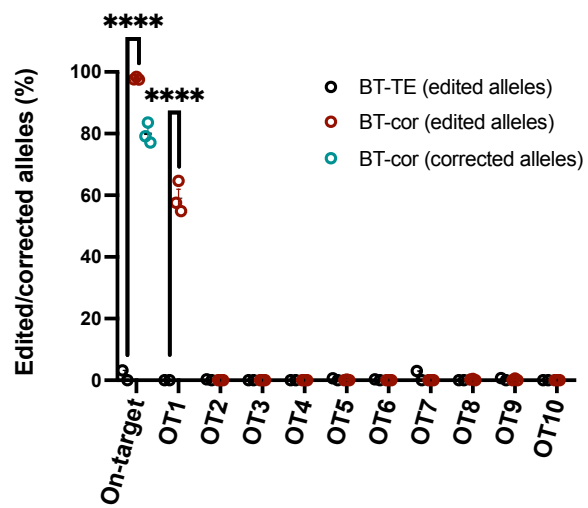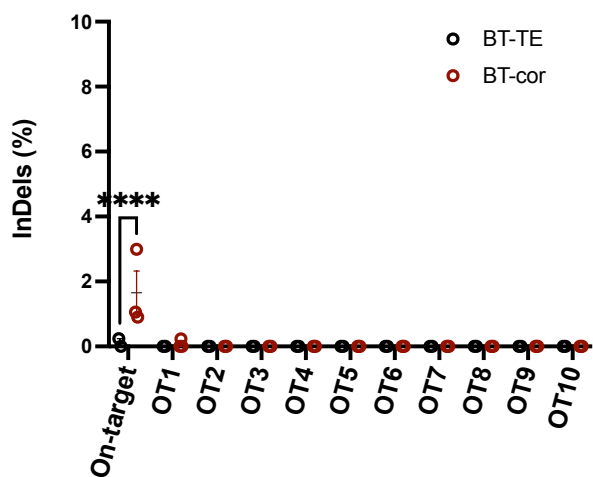



**D**

**BT0**

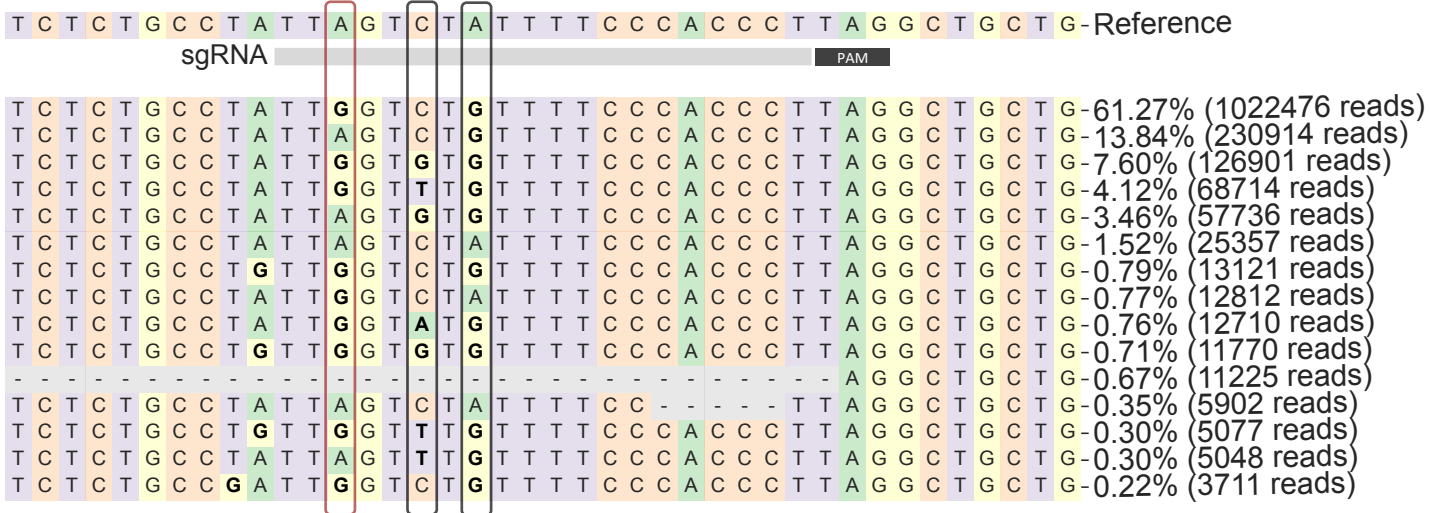

**BT1**

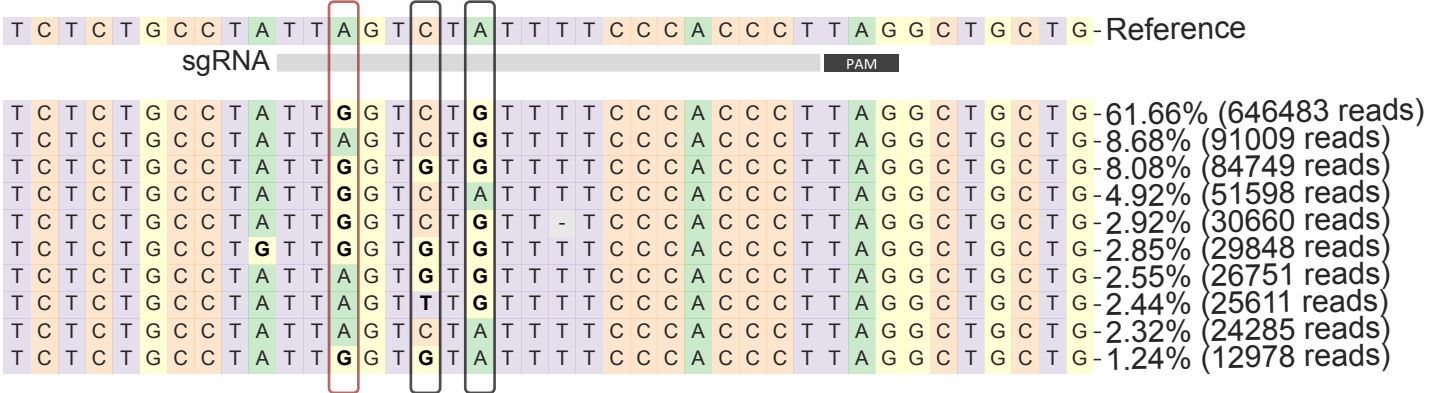

**BT2**

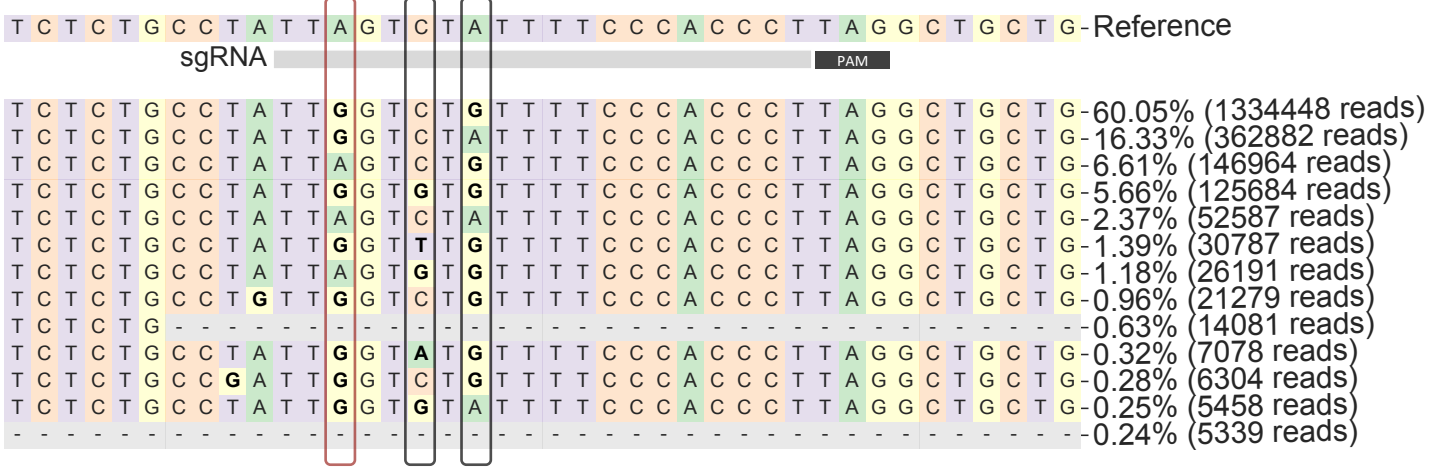

**E**

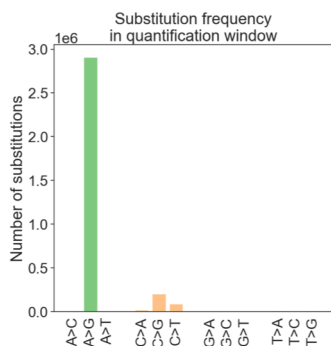

**BT0**

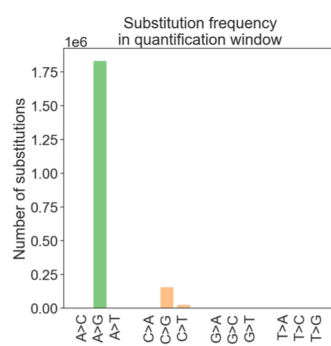

**BT1**

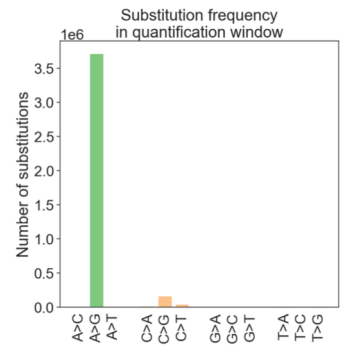

**BT2**

**A**

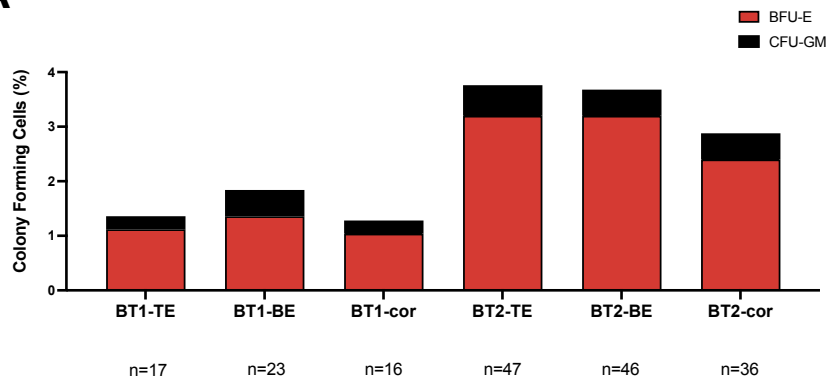

**B**

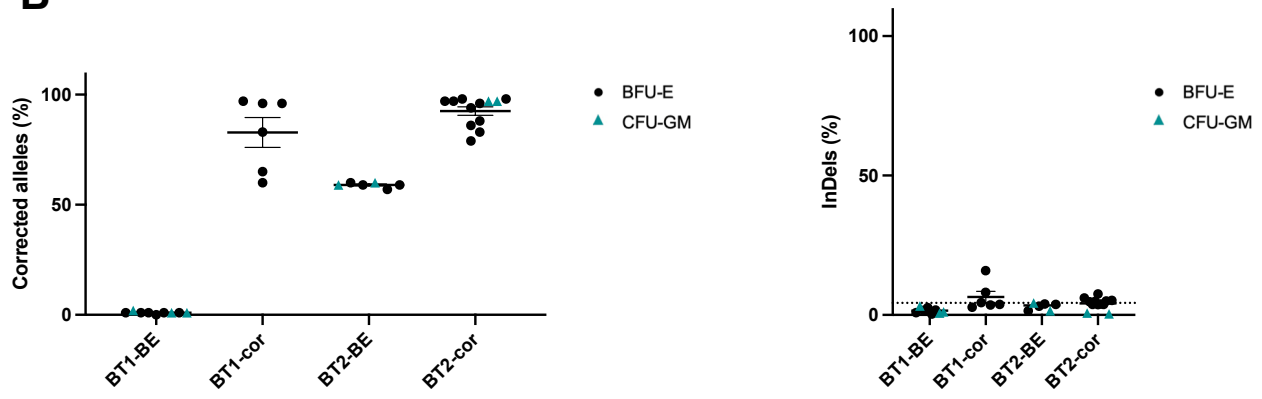

Supplemental Figure 4

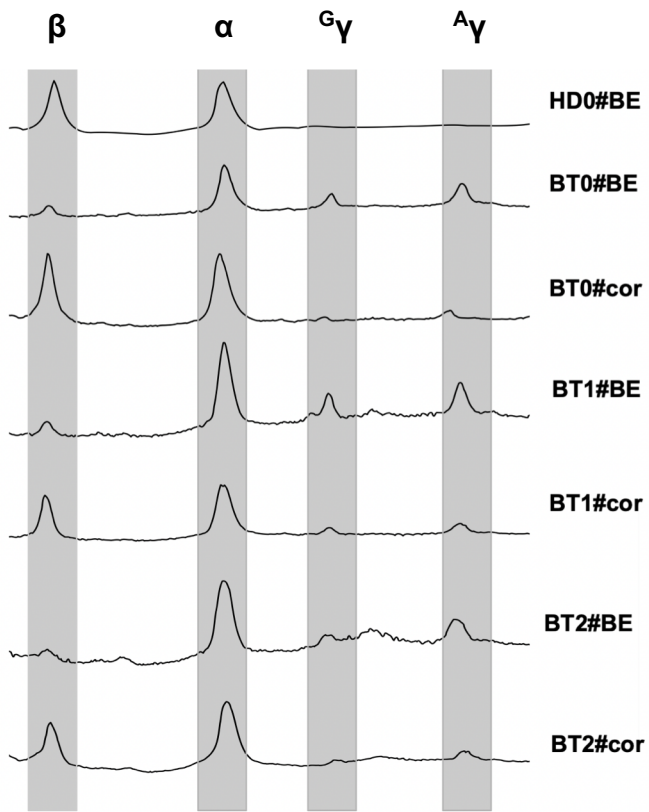

**A**

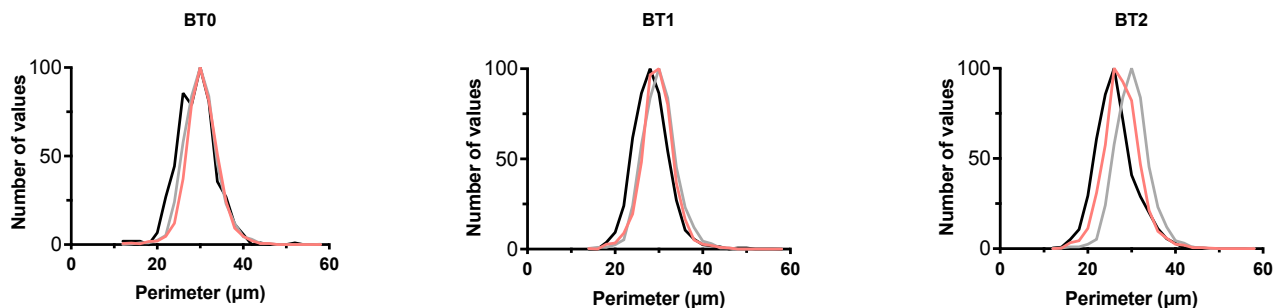

**B**

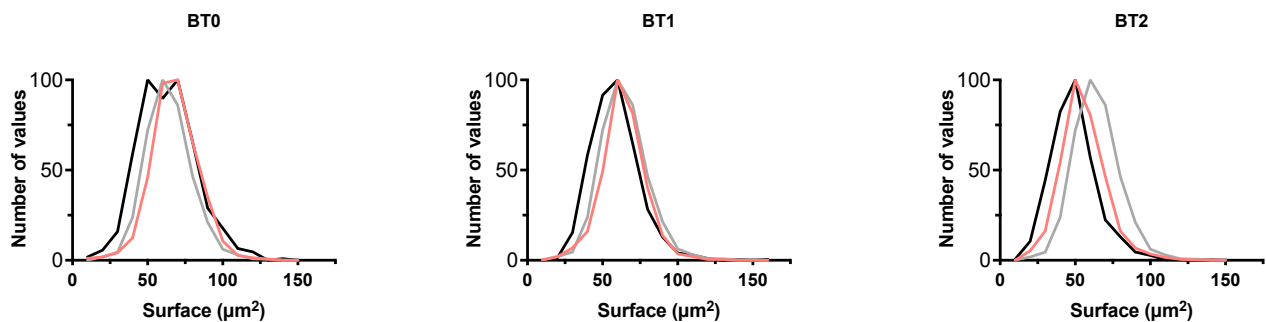

**C**

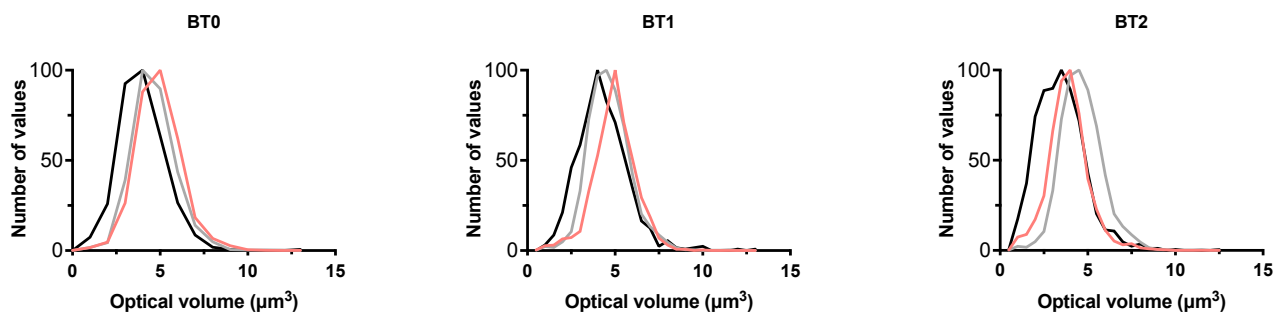

**D**

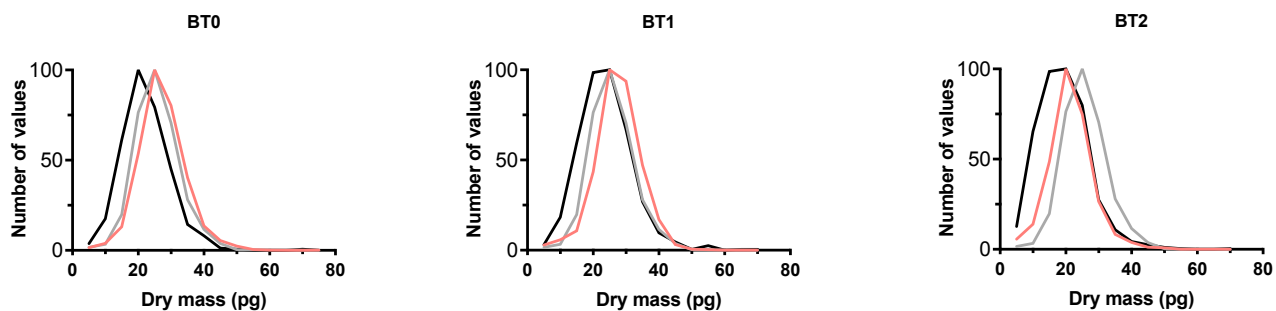

**E**

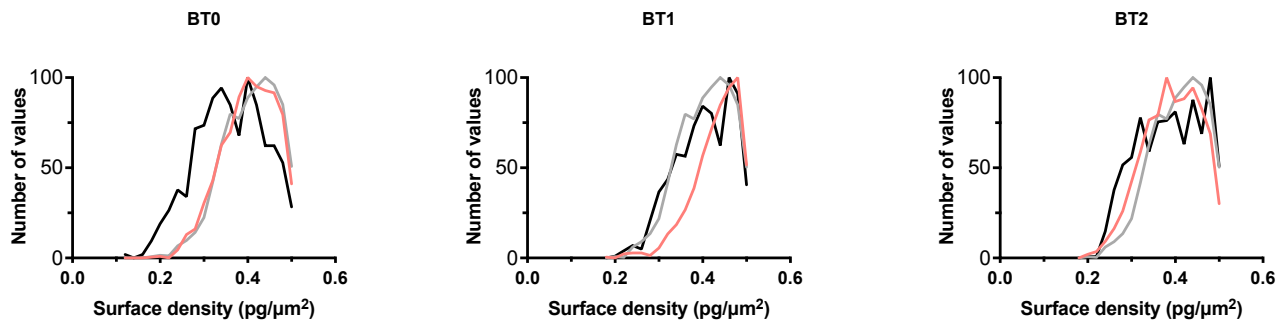

— HD-BE  
 — BT-BE  
 — BT-cor

Supplemental Figure 6

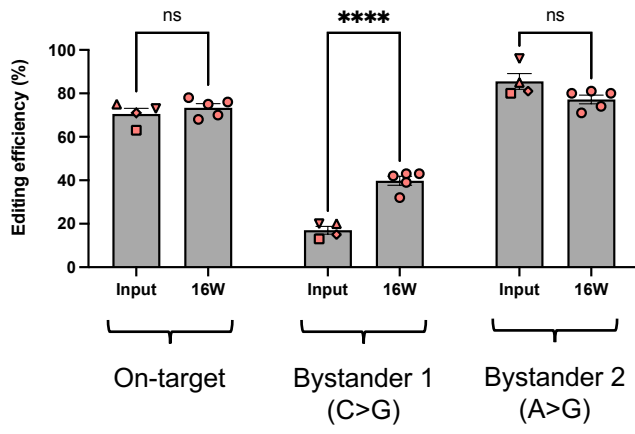

Supplement: BLOOD_BLD-2022-016629-mmc1.pdf [file BLOOD_BLD-2022-016629-mmc1.pdf]
